# Supplementary figures and images for: Association between Hepatic Oxidative Stress Related Factors and Activation of Wnt/β-Catenin Signaling in NAFLD-Induced Hepatocellular Carcinoma
Source: MDPI journal article supplement (doi:10.3390/cancers14092066), 2022-04-20

# Supplementary Figure S2

a

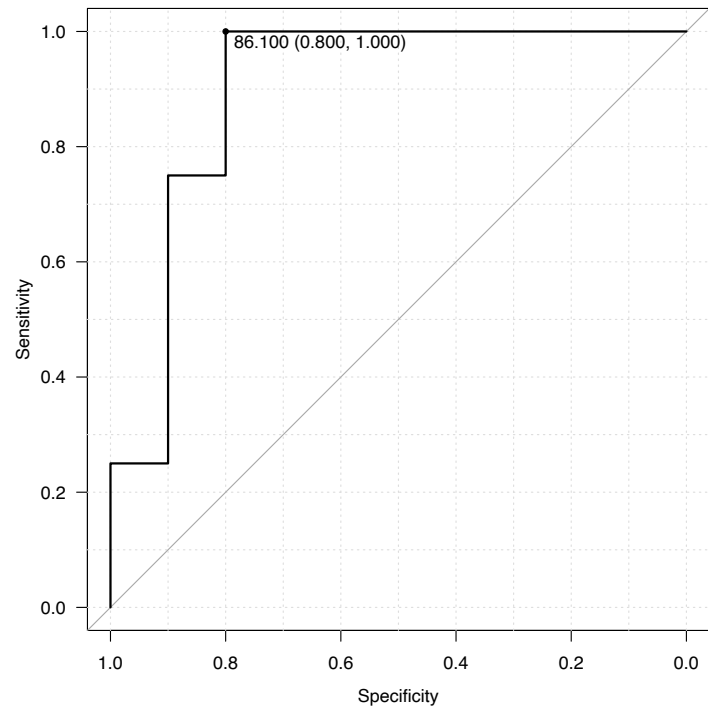

b

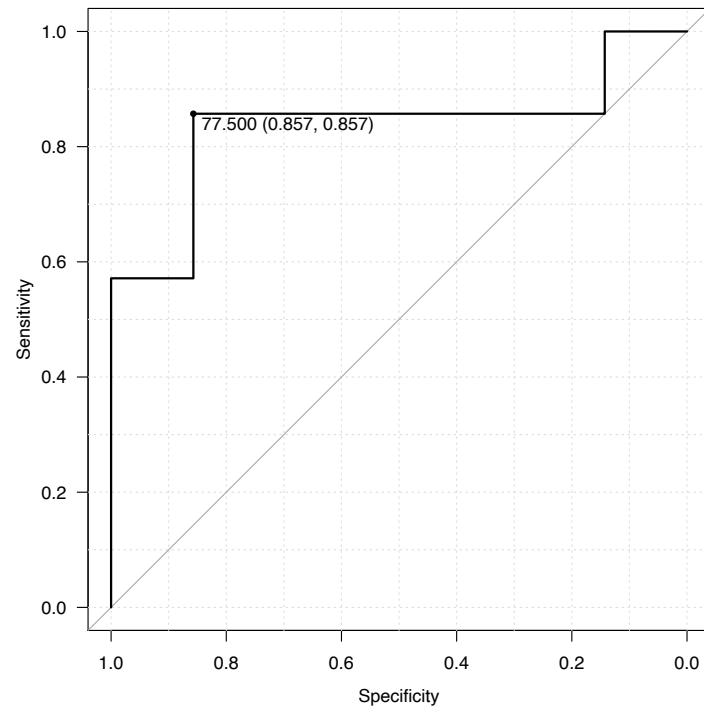

c

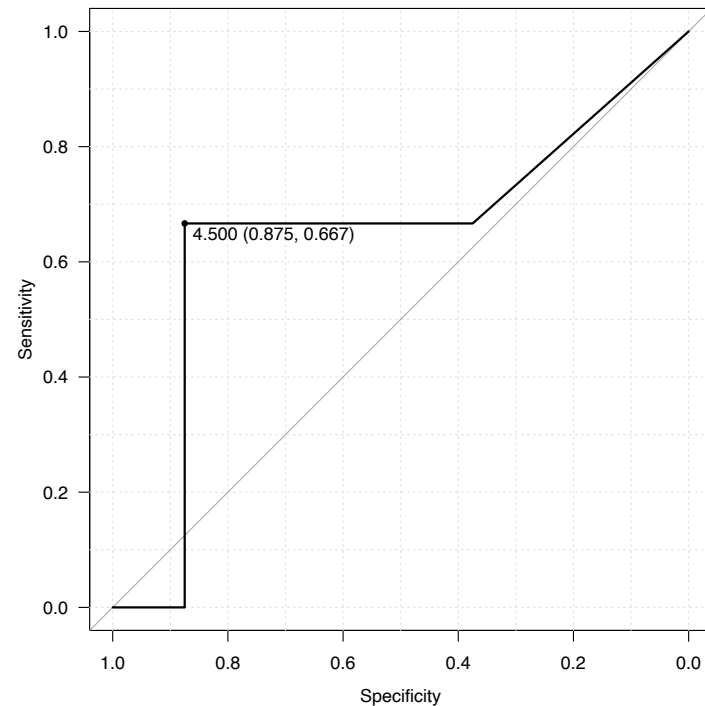

Supplement: s1 [file s1]
